# Supplementary material
Source: PubMed Central journal article supplement (PMC11386808)
Supplement: PBI-17-881-s001.pdf [file PBI-17-881-s001.pdf]

**Table S2. Detail information of predicted protein-coding genes among five sesame varieties.**

| Species     | Gene number | %good orf | Start code | Stop code | Single exon gene | % single exon gene | Average gene length (bp) | Average CDS length (bp) | Average exons per gene | Average exon length (bp) | Average intron length (bp) |
|-------------|-------------|-----------|------------|-----------|------------------|--------------------|--------------------------|-------------------------|------------------------|--------------------------|----------------------------|
| Zhongzhi13  | 36,189      | 90.73%    | 94.33%     | 93.53%    | 6,667            | 19.67%             | 3,718                    | 1,259                   | 5.03                   | 250                      | 609                        |
| Yuzhi11     | 26,022      | 91.51%    | 94.50%     | 94.76%    | 4,908            | 18.86%             | 3,623                    | 1,300                   | 5.49                   | 237                      | 516                        |
| Swetha      | 41,859      | 90.69%    | 94.60%     | 93.12%    | 6,418            | 15.33%             | 4,032                    | 1,225                   | 5.4                    | 227                      | 636                        |
| Baizhima    | 31,558      | 90.79%    | 94.35%     | 93.70%    | 6,217            | 19.70%             | 3,673                    | 1,266                   | 5.15                   | 246                      | 579                        |
| Mishuozhima | 30,995      | 90.87%    | 94.42%     | 93.78%    | 6,067            | 19.57%             | 3,700                    | 1,265                   | 5.19                   | 244                      | 579                        |
