# Supplementary material
Source: PubMed Central journal article supplement (PMC11386808)
Supplement: PBI-17-881-s002.pdf [file PBI-17-881-s002.pdf]

**Table S3. Statistics of gene families among 12 plant species.**

| <b>Species</b>              | <b>Genes number</b> | <b>Genes in families</b> | <b>Unclustered genes</b> | <b>Family number</b> | <b>Unique families</b> | <b>Average genes per family</b> |
|-----------------------------|---------------------|--------------------------|--------------------------|----------------------|------------------------|---------------------------------|
| <b>Baizhima</b>             | 31,558              | 30,079                   | 1,479                    | 22,837               | 11                     | 1.32                            |
| <b>Mishuozhima</b>          | 30,995              | 29,678                   | 1,317                    | 22,660               | 8                      | 1.31                            |
| <b>Swetha</b>               | 41,859              | 33,621                   | 8,238                    | 20,662               | 185                    | 1.63                            |
| <b>Yuzhi11</b>              | 26,022              | 24,907                   | 1,115                    | 19,384               | 8                      | 1.28                            |
| <b>Zhongzhi13</b>           | 36,189              | 32,448                   | 3,741                    | 23,541               | 155                    | 1.38                            |
| <i>Utricularia gibba</i>    | 25,930              | 18,227                   | 7,703                    | 10,640               | 551                    | 1.71                            |
| <i>Solanum lycopersicum</i> | 33,785              | 25,887                   | 7,898                    | 16,561               | 504                    | 1.56                            |
| <i>Solanum tuberosum</i>    | 39,021              | 31,796                   | 7,225                    | 16,238               | 800                    | 1.96                            |
| <i>Vitis vinifera</i>       | 29,927              | 22,403                   | 7,524                    | 13,417               | 778                    | 1.67                            |
| <i>Arabidopsis thaliana</i> | 27,628              | 23,649                   | 3,979                    | 12,835               | 866                    | 1.84                            |
| <i>Zea mays</i>             | 39,498              | 32,527                   | 6,971                    | 15,880               | 1,820                  | 2.05                            |
| <i>Oryza sativa</i>         | 35,679              | 24,645                   | 11,034                   | 15,365               | 1,326                  | 1.6                             |
